# Supplementary material for: Technical Determinants of On-Water Rowing Performance
Source: Front Sports Act Living. 2020 Dec 3;2:589013. doi: 10.3389/fspor.2020.589013 (PMC7739831; doi:10.3389/fspor.2020.589013)
Supplement: Supplementary file 5 [file Table_5.docx]

Supplementary Material

| **Supplementary Table 5.** Differences between crews in the effects of the technical variables shown in Supplementary Table 2, with adjustment for power in the four boat classes. Data are SD (%), ±90% compatibility limits (approximate), with observed magnitude and p values for non-inferiority and non-superiority tests (p–/p+). | | | | |
| --- | --- | --- | --- | --- |
|  | M1x | W1x | M2- | W2- |
| **Time and velocity variables** | | | | |
| Stroke rate | 2.2, ±1.1;  large***  0.03/0.97 | 1.1, ±0.8;  mod**  0.05/0.95 | —a | 1.0, ±1.0;  mod  0.08/0.91 |
| Within-stroke velocity range | 0.5, ±0.7;  mod  0.17/0.79 | 0.8, ±0.7;  large  0.07/0.91 | 0.4, ±0.8;  small  0.31/0.65 | 0.7, ±0.9;  mod  0.14/0.84 |
| Time form catch to minimum velocity | 1.2, ±1.1;  large  0.03/0.97 | 0.5, ±0.5;  mod  0.10/0.85 | 0.2, ±0.5;  small  0.29/0.58 | 0.2, ±0.4;  small  0.04/0.90 |
| Distance per stroke | 1.8, ±0.8;  v.large***  0.03/0.97 | 1.7, ±0.9;  v.large***  0.05/0.94 | 0.7, ±1.3;  mod  0.11/0.88 | 1.3, ±1.1;  v.large  0.06/0.94 |
| **Force variables** | | | | |
| Mean force | 2.4, ±0.8;  e.large***  0.005/0.99 | 1.4, ±1.4;  v.large  0.08/0.91 | 0.5, ±0.6;  mod  0.15/0.81 | 3.6, ±1.7;  e.large***  0.02/0.98 |
| Peak force | 1.6, ±0.6;  v.large***  0.01/0.99 | 0.9, ±0.5;  large***  0.03/0.96 | 1.3, ±1.6;  v.large  0.18/0.82 | 2.4, ±1.1;  e.large***  0.02/0.98 |
| Rate of force development | 0.9, ±0.3;  large***  0.004/0.99 | 0.5, ±0.3;  mod  0.03/0.94 | 0.5, ±0.6;  mod  0.16/0.80 | 0.8, ±0.4;  large***  0.02/0.97 |
| Time to peak force from the catch | 0.6, ±0.3;  mod***  0.02/0.97 | 0.3, ±0.3;  small**  0.03/0.86 | 0.5, ±0.6;  mod  0.11/0.85 | 1.1, ±0.5;  large***  0.02/0.97 |
| Mean to peak force ratio | 0.6, ±0.2;  mod***  0.009/0.98 | 0.4, ±0.2;  small***  0.02/0.96 | 0.2, ±0.3;  small  0.09/0.67 | 0.8, ±0.4;  large***  0.03/0.97 |
| Peak force angle | 0.5, ±0.2;  mod***  0.07/0.98 | 0.4, ±0.2;  small**  0.03/0.92 | 0.3, ±0.4;  small  0.15/0.75 | 0.4, ±0.4;  small  0.07/0.87 |
| **Oar angle variables** | | | | |
| Catch slip | 0.7, ±0.3;  mod***  0.007/0.99 | 0.5, ±0.2;  mod***  0.02/0.97 | 0.4, ±0.5;  small  0.14/0.79 | 0.1, ±0.3;  trivial  0.22/0.39 |
| Finish slip | 0.6, ±0.3;  mod***  0.01/0.97 | 0.3, ±0.3;  small  0.09/0.78 | 0.4, ±0.5;  small  0.17/0.76 | —a |
| Finish angle | 0.5, ±0.2;  mod**  0.02/0.95 | 0.7, ±0.3;  mod***  0.02/0.98 | 0.7, ±0.5;  mod**  0.05/0.94 | 1.4, ±1.6;  v.large  0.13/0.87 |
| Arc angle | 0.9, ±0.4;  large***  0.007/0.99 | 0.6, ±0.3;  mod***  0.02/0.97 | 0.4, ±0.75;  small  0.19/0.74 | 1.4, ±1.6;  v.large  0.13/0.86 |
| Catch angle | 1.2, ±0.4;  large***  0.008/0.99 | 0.8, ±0.4;  large***  0.02/0.97 | 0.6, ±1.2;  mod  0.31/0.67 | 0.9, ±0.5;  large**  0.04/0.95 |
| M1x, men’s single scull; W1x, women’s single scull; M2-, men’s coxless pairs; W2- women’s coxless pairs.  Number of crews: 10, 8, 3 and 6 respectively.  Number of races: 17, 13, 5, 12 respectively.  a Indicates insufficient data for model to converge adequately.  Scale of magnitudes: <0.15%, trivial; 0.15-0.45%, small; 0.45-0.8%, moderate (mod); 0.8-1.26%, large; 1.26-2.02%, very large (v.large); >2.02%, extremely large (e.large).  Reference-Bayesian likelihoods of substantial change: *possibly; **likely; ***very likely, ****most likely.  *** and **** indicate rejection of the non-superiority or non-inferiority hypothesis (pN- or pN+ <0.05 and <0.005 respectively).  Likelihoods are not shown for effects with inadequate precision at the 90% level (failure to reject any hypotheses: p>0.05).  Effects in **bold** have adequate precision at the 99% level (p<0.005). | | | | |
